# Supplementary material for: Human Papillomavirus in Non-Small Cell Lung Carcinoma: Assessing Virus Presence in Tumor and Normal Tissues and Its Clinical Relevance
Source: MDPI journal article supplement (doi:10.3390/microorganisms11010212), 2023-01-14
Supplement: s1 [file s1]

## Supplement 2

Table S2. Relationship between the presence of HPV and the main clinical and pathological parameters of patients with non-small cell lung cancer.

| Clinical and pathological parameter |                  | Total number of patients (abs., %).<br>(n=274) |                   |             | Number of NAC patients (abs., %).<br>(n=126) |                  |             | Number of Patients with primary<br>operable LC (abs., %). (n=148) |                  |             |
|-------------------------------------|------------------|------------------------------------------------|-------------------|-------------|----------------------------------------------|------------------|-------------|-------------------------------------------------------------------|------------------|-------------|
|                                     |                  | HPV+                                           | HPV-              | p-level     | HPV+                                         | HPV-             | p-level     | HPV+                                                              | HPV-             | p-level     |
| Age                                 | ≤50 years        | 4 (11.4)                                       | 31 (88.6)         | 1           | 2 (13.3)                                     | 13 (86.7)        | 0.63        | 2 (10.0)                                                          | 18 (90.0)        | 0.53        |
|                                     | >50 years        | 31 (13.0)                                      | 208 (87.0)        |             | 10 (9.0)                                     | 101 (91.0)       |             | 21 (16.4)                                                         | 107 (83.6)       |             |
| Gender                              | Male             | <b>28 (11.5)</b>                               | <b>215 (88.5)</b> | <b>0.09</b> | 10 (8.7)                                     | 105 (91.3)       | 0.59        | 18 (14.1)                                                         | 110 (85.9)       | 0.31        |
|                                     | Female           | <b>7 (22.6)</b>                                | <b>24 (77.4)</b>  |             | 2 (18.2)                                     | 9 (81.8)         |             | 5 (25.0)                                                          | 15 (75.0)        |             |
| Tumor size                          | T <sub>1-2</sub> | 12 (9.4)                                       | 116 (90.6)        | 0.14        | <b>1 (2.2)</b>                               | <b>44 (97.8)</b> | <b>0.05</b> | 11 (13.3)                                                         | 72 (86.7)        | 0.49        |
|                                     | T <sub>3-4</sub> | 23 (15.8)                                      | 123 (84.2)        |             | <b>11 (13.6)</b>                             | <b>70 (86.4)</b> |             | 12 (18.5)                                                         | 53 (81.5)        |             |
| Lymphogenous metastasis             | N <sub>0</sub>   | <b>19 (18.6)</b>                               | <b>83 (81.4)</b>  | <b>0.03</b> | 6 (11.5)                                     | 46 (88.5)        | 0.55        | <b>13 (26.0)</b>                                                  | <b>37 (74.0)</b> | <b>0.01</b> |
|                                     | N <sub>1-3</sub> | <b>16 (9.3)</b>                                | <b>156 (90.7)</b> |             | 6 (8.1)                                      | 68 (91.9)        |             | <b>10 (10.2)</b>                                                  | <b>88 (89.8)</b> |             |
| Stage                               | IIB              | 14 (11.2)                                      | 111 (88.8)        | 0.58        | 3 (6.5)                                      | 43 (93.5)        | 0.53        | 11 (13.9)                                                         | 68 (86.1)        | 0.65        |
|                                     | IIIA             | 21 (14.1)                                      | 128 (85.9)        |             | 9 (11.3)                                     | 71 (88.8)        |             | 12 (17.4)                                                         | 57 (82.6)        |             |
| Clinical and anatomical form        | Central          | 14 (11.9)                                      | 104 (88.1)        | 0.71        | 9 (12.7)                                     | 62 (87.3)        | 0.22        | 5 (10.6)                                                          | 42 (89.4)        | 0.33        |
|                                     | Peripheral       | 21 (13.5)                                      | 135 (86.5)        |             | 3 (5.5)                                      | 52 (94.5)        |             | 18 (17.8)                                                         | 83 (82.2)        |             |
| Histological type                   | Squamous         | 18 (10.7)                                      | 150 (89.3)        | 0.26        | 8 (8.8)                                      | 83 (91.2)        | 0.73        | 10 (13.0)                                                         | 67 (87.0)        | 0.49        |
|                                     | Adenocarcinoma   | 17 (16.0)                                      | 89 (84.0)         |             | 4 (11.4)                                     | 31 (88.6)        |             | 13 (18.3)                                                         | 58 (81.7)        |             |

Note: Bold indicates statistically significant differences; bold and italic - relationship at the level of a pronounced trend ( $p < 0.1$ ).

Table S3. Relationship of HPV viral load in patients with the main clinical and pathological parameters.

| Clinical and pathological parameter |                  | Total number of patients (abs., %). (n=35) |                 |                 |             | Number of NAC patients (abs., %). (n=12) |                 |                 |             | Number of Patients with primary operable LC (abs., %). (n=23) |             |           |         |
|-------------------------------------|------------------|--------------------------------------------|-----------------|-----------------|-------------|------------------------------------------|-----------------|-----------------|-------------|---------------------------------------------------------------|-------------|-----------|---------|
|                                     |                  | Insignificant                              | Significant     | Increased       | P-level     | Insignificant                            | Significant     | Increased       | P-level     | Insignificant                                                 | Significant | Increased | P-level |
| Age                                 | ≤50 years        | 4 (100.0)                                  | 0 (0.0)         | 0 (0.0)         | 0.45        | 2 (100.0)                                | 0 (0.0)         | 0 (0.0)         | 0.54        | 2 (100.0)                                                     | 0 (0.0)     | 0 (0.0)   | 0.73    |
|                                     | >50 years        | 22 (71.0)                                  | 5 (16.1)        | 4 (12.9)        |             | 6 (60.0)                                 | 3 (30.0)        | 1 (10.0)        |             | 16 (76.2)                                                     | 2 (9.5)     | 3 (14.3)  |         |
| Gender                              | Male             | 18 (66.7)                                  | 5 (18.5)        | 4 (14.8)        | 0.45        | 6 (60.0)                                 | 3 (30.0)        | 1 (10.0)        | 0.54        | 12 (70.6)                                                     | 2 (11.8)    | 3 (17.6)  | 0.72    |
|                                     | Female           | 6 (85.7)                                   | 0 (0.0)         | 1 (14.3)        |             | 2 (100.0)                                | 0 (0.0)         | 0 (0.0)         |             | 4 (80.0)                                                      | 0 (0.0)     | 1 (20.0)  |         |
| Tumor size                          | T <sub>1-2</sub> | 9 (75.0)                                   | 1 (8.3)         | 2 (16.7)        | 0.75        | 1 (100.0)                                | 0 (0.0)         | 0 (0.0)         | 0.75        | 8 (72.7)                                                      | 1 (9.1)     | 2 (18.2)  | 0.99    |
|                                     | T <sub>3-4</sub> | 16 (69.6)                                  | 4 (17.4)        | 3 (13.0)        |             | 7 (63.6)                                 | 3 (27.3)        | 1 (9.1)         |             | 9 (75.0)                                                      | 1 (8.3)     | 2 (16.7)  |         |
| Lymphogenous metastasis             | N <sub>0</sub>   | 13 (68.4)                                  | 4 (21.1)        | 2 (10.5)        | 0.78        | <b>3 (50.0)</b>                          | <b>3 (50.0)</b> | <b>0 (0.0)</b>  | <b>0.10</b> | 10 (76.9)                                                     | 1 (7.7)     | 2 (15.4)  | 0.93    |
|                                     | N <sub>1-3</sub> | 12 (75.0)                                  | 1 (6.3)         | 3 (18.8)        |             | <b>5 (83.3)</b>                          | <b>0 (0.0)</b>  | <b>1 (16.7)</b> |             | 7 (70.0)                                                      | 1 (10.0)    | 2 (20.0)  |         |
| Stage                               | IIB              | 10 (71.4)                                  | 2 (14.3)        | 2 (14.3)        | 1           | 2 (66.7)                                 | 1 (33.3)        | 0 (0.0)         | 0.80        | 8 (72.7)                                                      | 1 (9.1)     | 2 (18.2)  | 0.99    |
|                                     | IIIA             | 15 (71.4)                                  | 3 (14.3)        | 3 (4.0)         |             | 6 (66.7)                                 | 2 (22.2)        | 1 (11.1)        |             | 9 (75.0)                                                      | 1 (8.3)     | 2 (16.7)  |         |
| Clinical and anatomical form        | Central          | <b>7 (50.0)</b>                            | <b>4 (28.6)</b> | <b>3 (14.3)</b> | <b>0.05</b> | 5 (55.6)                                 | 3 (33.3)        | 1 (11.1)        | 0.36        | 2 (40.0)                                                      | 1 (20.0)    | 2 (40.0)  | 0.14    |
|                                     | Peripheral       | <b>18 (85.7)</b>                           | <b>1 (4.8)</b>  | <b>2 (21.4)</b> |             | 3 (100.0)                                | 0 (0.0)         | 0 (0.0)         |             | 15 (83.3)                                                     | 1 (5.6)     | 2 (11.1)  |         |
| Histological type                   | Squamous         | 11 (61.1)                                  | 3 (16.7)        | 4 (22.2)        | 0.31        | 5 (62.5)                                 | 2 (25.0)        | 1 (12.5)        | 0.75        | 6 (60.0)                                                      | 1 (10.0)    | 3 (30.0)  | 0.34    |
|                                     | Adenocarcinoma   | 14 (82.4)                                  | 2 (11.8)        | 1 (5.9)         |             | 3 (75.0)                                 | 1 (25.0)        | 0 (0.0)         |             | 11 (84.6)                                                     | 1 (7.7)     | 1 (7.7)   |         |

Note: Bold indicates statistically significant differences; bold and italic - relationship at the level of a pronounced trend ( $p < 0.1$ ).

Table S4. Relationship of the physical status of HPV (for types 16, 18 and 45) with the main clinical and pathological parameters.

| Clinical and pathological parameter |                  | Total number of patients (abs., %). (n=18) |                 |                  |             | Number of NAC patients (abs., %). (n=6) |         |            |         | Number of Patients with primary operable LC (abs., %). (n=12) |                 |                 |             |
|-------------------------------------|------------------|--------------------------------------------|-----------------|------------------|-------------|-----------------------------------------|---------|------------|---------|---------------------------------------------------------------|-----------------|-----------------|-------------|
|                                     |                  | Episomal                                   | Mixed           | Integrated       | p-level     | Episomal                                | Mixed   | Integrated | p-level | Episomal                                                      | Mixed           | Integrated      | p-level     |
| Age                                 | ≤50 years        | 0 (0.0)                                    | 0 (0.0)         | 1 (100.0)        | 0.58        | 0 (0.0)                                 | 0 (0.0) | 1 (100.0)  | 0.88    | 0 (0.0)                                                       | 0 (0.0)         | 0 (0.0)         | 1           |
|                                     | >50 years        | 6 (35.3)                                   | 2 (11.8)        | 9 (52.9)         |             | 1 (20.0)                                | 0 (0.0) | 4 (80.0)   |         | 5 (41.7)                                                      | 3 (25.0)        | 4 (33.3)        |             |
| Gender                              | Male             | 4 (30.8)                                   | 1 (7.7)         | 8 (61.5)         | 0.64        | 1 (20.0)                                | 0 (0.0) | 4 (80.0)   | 0.88    | 3 (37.5)                                                      | 1 (12.5)        | 4 (50.0)        | 0.68        |
|                                     | Female           | 2 (40.0)                                   | 1 (20.0)        | 2 (40.0)         |             | 0 (0.0)                                 | 0 (0.0) | 1 (100.0)  |         | 2 (50.0)                                                      | 1 (25.0)        | 1 (25.0)        |             |
| Tumor size                          | T <sub>1-2</sub> | <b>3 (100.0)</b>                           | <b>0 (0.0)</b>  | <b>0 (0.0)</b>   | <b>0.02</b> | 0 (0.0)                                 | 0 (0.0) | 0 (0.0)    | 1       | <b>3 (100.0)</b>                                              | <b>0 (0.0)</b>  | <b>0 (0.0)</b>  | <b>0.06</b> |
|                                     | T <sub>3-4</sub> | <b>3 (20.0)</b>                            | <b>2 (13.3)</b> | <b>10 (66.7)</b> |             | 1 (16.7)                                | 0 (0.0) | 5 (83.3)   |         | <b>2 (22.2)</b>                                               | <b>2 (22.2)</b> | <b>5 (55.6)</b> |             |
| Lymphogenous metastasis             | N <sub>0</sub>   | 4 (36.4)                                   | 1 (9.1)         | 6 (54.5)         | 0.64        | 0 (0.0)                                 | 0 (0.0) | 3 (100.0)  | 0.54    | 4 (50.0)                                                      | 1 (12.5)        | 3 (37.5)        | 0.68        |
|                                     | N <sub>1-3</sub> | 2 (28.6)                                   | 1 (14.3)        | 4 (57.1)         |             | 1 (33.3)                                | 0 (0.0) | 2 (66.7)   |         | 1 (25.0)                                                      | 1 (25.0)        | 2 (50.0)        |             |
| Stage                               | IIB              | 3 (50.0)                                   | 1 (16.7)        | 2 (33.3)         | 0.40        | 0 (0.0)                                 | 0 (0.0) | 1 (100.0)  | 0.88    | 3 (60.0)                                                      | 1 (20.0)        | 1 (20.0)        | 0.42        |
|                                     | IIIA             | 3 (25.0)                                   | 1 (8.3)         | 8 (66.7)         |             | 1 (20.0)                                | 0 (0.0) | 4 (80.0)   |         | 2 (28.6)                                                      | 1 (14.3)        | 4 (57.1)        |             |
| Clinical and anatomical form        | Central          | 2 (28.6)                                   | 1 (14.3)        | 4 (57.1)         | 0.90        | 1 (20.0)                                | 0 (0.0) | 4 (80.0)   | 0.88    | 1 (50.0)                                                      | 1 (50.0)        | 0 (0.0)         | 0.26        |
|                                     | Peripheral       | 4 (36.4)                                   | 1 (9.1)         | 6 (54.5)         |             | 0 (0.0)                                 | 0 (0.0) | 1 (100.0)  |         | 4 (40.0)                                                      | 1 (10.0)        | 5 (50.0)        |             |
| Histological type                   | Squamous         | 3 (30.0)                                   | 1 (10.0)        | 6 (60.0)         | 0.91        | 1 (25.0)                                | 0 (0.0) | 3 (75.0)   | 0.74    | 2 (33.3)                                                      | 1 (16.7)        | 3 (50.0)        | 0.81        |
|                                     | Adenocarcinoma   | 3 (37.5)                                   | 1 (12.5)        | 4 (50.0)         |             | 0 (0.0)                                 | 0 (0.0) | 2 (100.0)  |         | 3 (50.0)                                                      | 1 (16.7)        | 2 (33.3)        |             |

Note: Bold indicates statistically significant differences; bold and italic - relationship at the level of a pronounced trend ( $p<0.1$ ).
