# Supplementary material for: Human Papillomavirus in Non-Small Cell Lung Carcinoma: Assessing Virus Presence in Tumor and Normal Tissues and Its Clinical Relevance
Source: MDPI journal article supplement (doi:10.3390/microorganisms11010212), 2023-01-14
Supplement: s1 [file s1]

Table S1. Sequence of the primers and probes used in the study

| Genes      |           | Amplicon (bp) | Sequence                                         |
|------------|-----------|---------------|--------------------------------------------------|
| <i>HBB</i> |           | 124 bp        | F 5'-gccagccgagccacatc-3'                        |
|            |           |               | R 5'-ggcaacaatatccactttaccaga-3'                 |
|            |           |               | Probe FAM 5'-cgccaataacgaccaaattccg-3' BHQ1      |
| HPV16      | <i>E1</i> | 73 bp         | F 5'-gagaagatgaccagatcatgtt-3'                   |
|            |           |               | R 5'-atagcacagcctggatagcaa-3'                    |
|            |           |               | Probe HEX 5'-agacctcaacaccccagccat-3' BHQ2       |
|            | <i>E2</i> | 94 bp         | F 5'-actaagcaccctgactatgctatcc-3'                |
|            |           |               | R 5'-cttccatcacatcactgaacacttt-3'                |
|            |           |               | Probe HEX 5'-cagccaggatcgctgtcttaactgca-3' BHQ2  |
|            | <i>E6</i> | 121 bp        | F 5'-ggcgacgtaattcccgacta-3'                     |
|            |           |               | R 5'-agttcttcccaggctctgc-3'                      |
|            |           |               | Probe HEX 5'-accacaacctgcaccagactacatcca-3' BHQ2 |
|            | <i>E7</i> | 107 bp        | F 5'-acagctgtgtggtccttctgtg-3'                   |
|            |           |               | R 5'-cattgtcctctgtccaggcatc-3'                   |
|            |           |               | Probe HEX 5'-catcattcaccttggcacaggtgt-3' BHQ2    |
| HPV18      | <i>E1</i> | 73 bp         | F 5'-gagaagatgaccagatcatgtt-3'                   |
|            |           |               | R 5'-atagcacagcctggatagcaa-3'                    |
|            |           |               | Probe HEX 5'-agacctcaacaccccagccat-3' BHQ2       |
|            | <i>E2</i> | 94 bp         | F 5'-actaagcaccctgactatgctatcc-3'                |
|            |           |               | R 5'-cttccatcacatcactgaacacttt-3'                |
|            |           |               | Probe HEX 5'-cagccaggatcgctgtcttaactgca-3' BHQ2  |
|            | <i>E6</i> | 121 bp        | F 5'-ggcgacgtaattcccgacta-3'                     |
|            |           |               | R 5'-agttcttcccaggctctgc-3'                      |
|            |           |               | Probe HEX 5'-accacaacctgcaccagactacatcca-3' BHQ2 |
|            | <i>E7</i> | 107 bp        | F 5'-acagctgtgtggtccttctgtg-3'                   |
|            |           |               | R 5'-cattgtcctctgtccaggcatc-3'                   |
|            |           |               | Probe HEX 5'-catcattcaccttggcacaggtgt-3' BHQ2    |

Note: bp - base pair; F - forward primer; R - reverse primer.

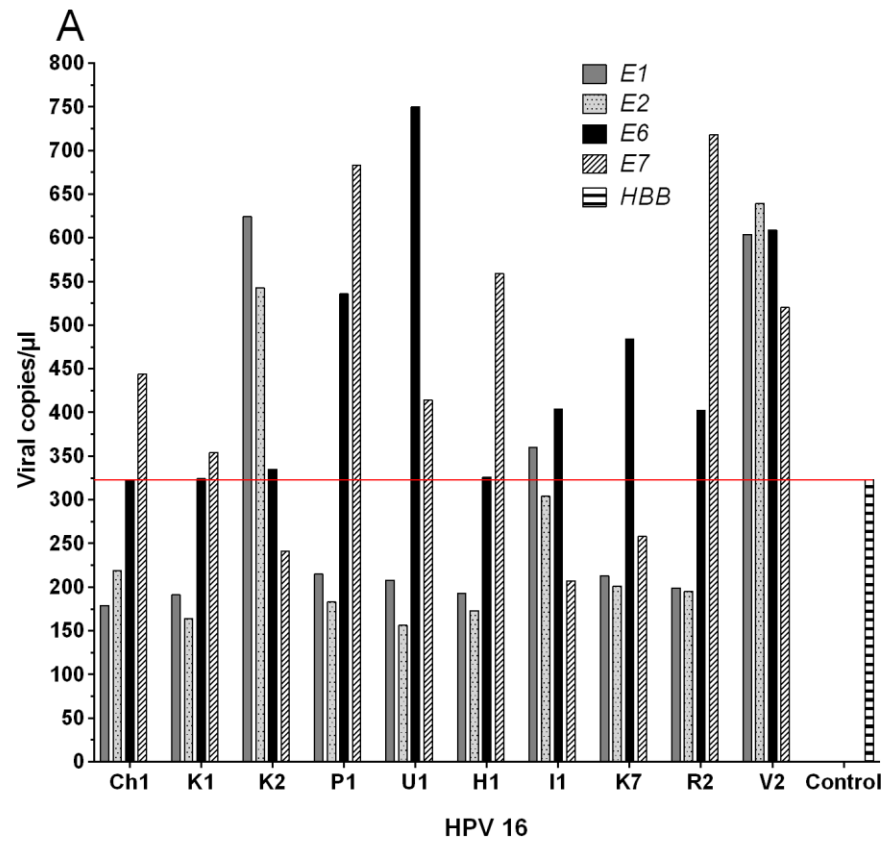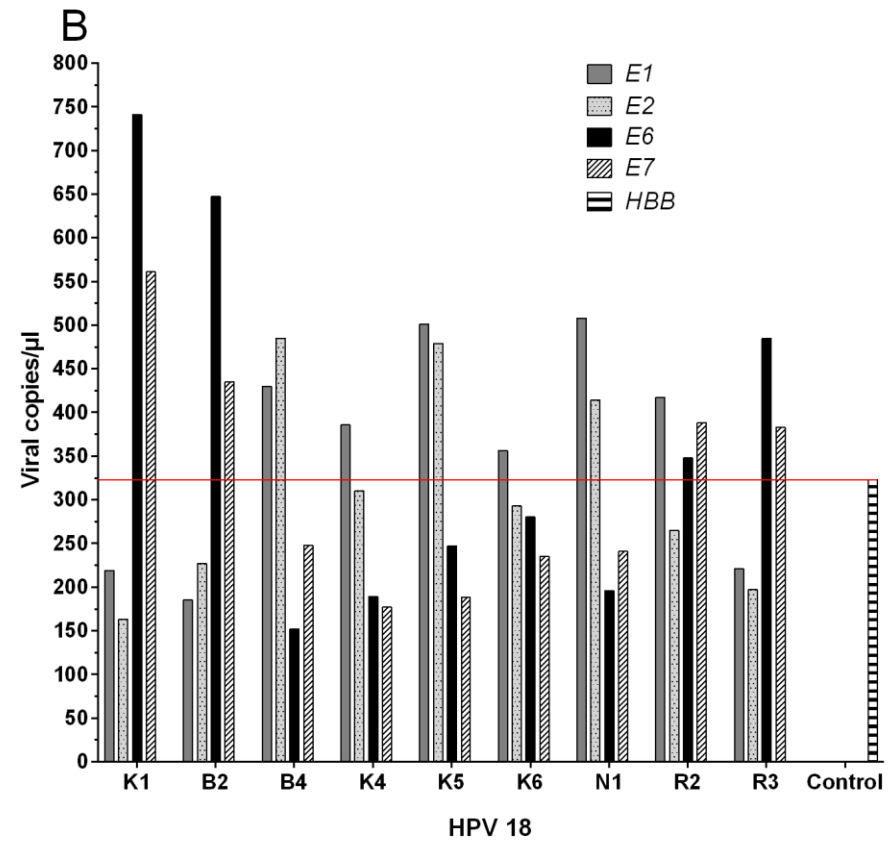

Figure S1. The result of ddPCR to assess the presence of HPV in the studied samples: viral copies per microliter for HPV 16 (A) and HPV 18 (B).
